# Supplementary material for: A budget impact analysis of cost to implement a whole child health focused, family-based intervention in primary care for children with elevated BMI
Source: Implement Sci Commun. 2023 Jun 5;4:59. doi: 10.1186/s43058-023-00429-z (PMC10240781; doi:10.1186/s43058-023-00429-z)
Supplement: Supplementary file 1 — Additional file 1. Description of implementation activities. [file 43058_2023_429_MOESM1_ESM.xlsx]

## Sheet: Table1
	Labor Activities	Activity Description
	Direct Intervention Delivery
	Facilitator/family meeting time	Direct service hours for interviews and FCU4Health intervention sessions
	FCU4Health Assessment*	Interviewer administration of the FCU4Health intervention family health behavior and ecological assessment; waves 1–3
	Other travel costs (time traveled to sessions)	Interviewer, FCU4Health coordinator, and family travel time (interview and FCU4Health intervention sessions)
	Mileage reimbursement (families/facilitators)	Interviewer, FCU4Health coordinator, and family mileage reimbursement for travel
	Intervention Delivery Infrastructure and Planning
	Tailoring and creating intervention materials/assessment techology	Members of the study team creating and tailoring intervention materials (documents, multimedia) for FCU4Health, typically from original FCU materials, and programming the assessment to include new and modified surveys specific to FCU4Health
	Meetings regarding clinical activities	Members of the study team convening to plan intervention workflows, training and consultation activities, and other aspects of the clinical delivery of FCU4Health to families
	Training and Supervision
	Tailoring training materials	Members of the study team tailoring materials (documents, multimedia) to be used for FCU4Health training, typically from original FCU materials, and additions specific to FCU4Health (e.g., nutrition education, health behavior guidelines)
	Meetings regarding training activities	Planning for initial and ongoing group-based training in FCU4Health
	Consultation preparation	Consultants reviewing families' FCU4Health assessment data, feedback and Everyday Parenting (EDP) session videotapes, Feedback Form, and Menu of Options in preparation for individual and group consultation
	COACH consultation	Consultants conducting COACH coding on intervention sessions for purposes of delivery support/consultation
	Consultation meetings with FCU4Health Coordinators	Consultants direct meeting time with FCU4Health coordinators in individual and group sessions
	Participating in training	Consultants time delivering formal FCU4Health training prior to Coordinators implementing the intervention
	Materials
	Reviewing new or revised materials	Materials not directly used in the FCU4Health, such as flyers and brochures for families and healthcare staff
	Administrative Delivery Support
	Meetings about delivery plan	Research team and collaborting site staff time in meetings about the plan and troubleshoot FCU4Health delivery
	Developing infrastructure to support delivery	Creation and maintenance of systems to support FCU4Health delivery (e.g., Salesforce software)
	Administrative
	Email communication	Communication within the implementation team
	Hiring clinical staff	Creating and posting positions for FCU4Health coordinators, reviewing applications, interviewing candidates, etc.
	Informatics
	Automated coding	Running FCU4Health session transcripts/audio-video files through automated coding pipeline, analysis and interpretation of results, tuning of automated coding scheme, creation of FCU4Health-specific codes, validation against COACH scores, etc.
	Practice Engagement/Community Advisory Board
	Meeting time	Time spent in meetings with key community members informing/conducting FCU4Health implementation
	Notes. * assessments are part of the intervention and also used for research purposes.
